# Supplementary material
Source: Springer Nature journal article supplement (https://www.springermedizin.de/resource/supplementary/12889_2012_5159_MOESM1_ESM.pdf/9494762)
Supplement: MOESM1 [file 9494762]

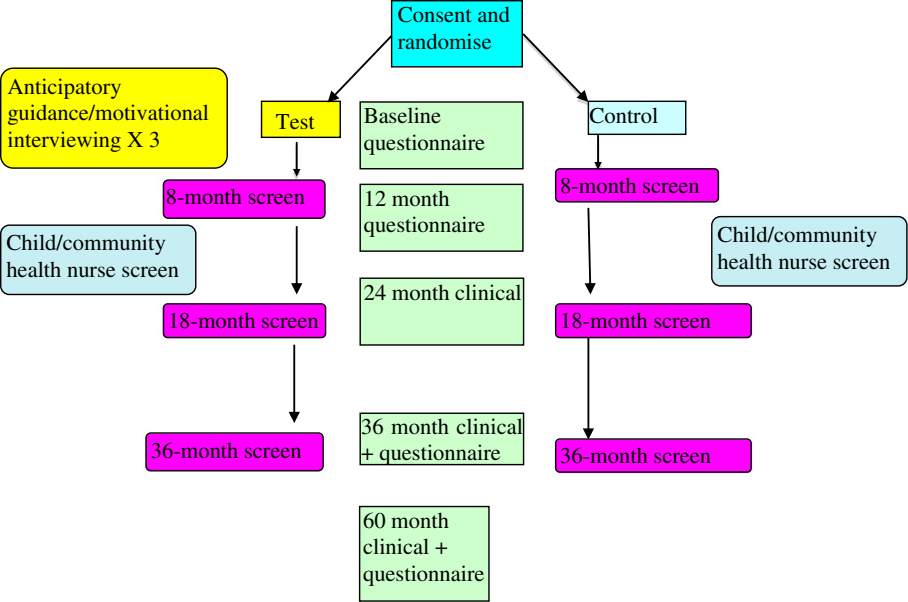

Consent and randomise

Anticipatory guidance/motivational interviewing X 3

Test

Control

Child/community health nurse screen

Child/community health nurse screen

8-month screen

Baseline questionnaire

12 month questionnaire

8-month screen

18-month screen

24 month clinical

18-month screen

36-month screen

36 month clinical + questionnaire

36-month screen

60 month clinical + questionnaire
